# Supplementary material for: Ultrasound guidance practices used for the placement of vascular accesses in intensive care units: an observational multicentre study
Source: Springer Nature journal article supplement (doi:10.1186/s40001-023-01518-4), 2023-11-16
Supplement: MOESM2 [file 26313062]

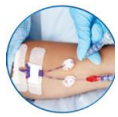

## FICHE ECHOGUIDAGE pour la pose des Cathéters Centraux et Midlines avec prolongateur intégré

|                                                                                              |                                                                                 |                                                      |                 |                      |                      |        |
|----------------------------------------------------------------------------------------------|---------------------------------------------------------------------------------|------------------------------------------------------|-----------------|----------------------|----------------------|--------|
| FINISS ÉTABLISSEMENT                                                                         |                                                                                 | _ _ _ _ _ _ _ _ _ _ _ _ _ _ _ _                      |                 |                      |                      |        |
| NUMÉRO DE FICHE P1                                                                           |                                                                                 | _ _ _ _ _                                            |                 |                      |                      |        |
| SITE D'INSERTION                                                                             | 1. JUGULAIRE                                                                    | 2. FÉMORAL                                           | 3. SOUS CLAVIER | _                    |                      |        |
|                                                                                              | 4. RADIAL                                                                       | 5. AUTRE => PRÉCISER                                 |                 |                      |                      |        |
| L'OPERATEUR                                                                                  |                                                                                 |                                                      |                 |                      |                      |        |
| VOTRE FONCTION                                                                               | 1. MÉDECIN                                                                      | 2. IADE                                              | 3. IDE          | 4. MANIP. RADIO      | 5. AUTRE => PRÉCISER | _      |
| ÉTUDIANT?                                                                                    |                                                                                 |                                                      | 1. OUI          | 2. NON               | _                    |        |
| L'AUDITE A RECU UNE FORMATION A L'ÉCHOGUIDAGE?                                               |                                                                                 |                                                      | 1. OUI          | 2. NON               | _                    |        |
| SI OUI                                                                                       | DATE DE LA FORMATION (la plus récente) A L'ÉCHOGUIDAGE                          |                                                      | 1. ≤1 an        | 2. > 1 an            | _                    |        |
|                                                                                              | TYPE DE FORMATION                                                               | 1. DIU                                               | 2. SOCIETE      | 3. AUTRE => PRÉCISER | _                    |        |
| PREPARATION DE L'ECHOGRAPHE                                                                  |                                                                                 |                                                      |                 |                      |                      |        |
| PREPARATION DE L'ECHOGRAPHE                                                                  |                                                                                 |                                                      | 1. OUI          | 2. NON               | _                    |        |
| SI OUI                                                                                       | PREPARATION DE L'ECHOGRAPHE PAR                                                 |                                                      | 1. OPERATEUR    | 2. AIDE              | _                    |        |
|                                                                                              | HYGIÈNE DES MAINS AVANT LA PREPARATION DE L'ECHOGRAPHE                          |                                                      | 1. OUI          | 2. NON               | _                    |        |
|                                                                                              | SI OUI, 1. PAR FRICTION 2. LAVAGE SIMPLE                                        |                                                      |                 |                      |                      |        |
|                                                                                              | SI OUI, LA TECHNIQUE EST-ELLE CONFORME?                                         |                                                      | 1. OUI          | 2. NON               | _                    |        |
| L'AUDITE REALISE UN ESSUYAGE HUMIDE DE LA SONDE D'ÉCHOGRAPHIE                                |                                                                                 |                                                      | 1. OUI          | 2. NON               | _                    |        |
| SI OUI                                                                                       | LE PRODUIT UTILISÉ : 1. DÉTERGENT 2. DÉTERGENT/DÉSINFECTANT 3. AUTRE (préciser) |                                                      |                 | _                    |                      |        |
| LE REPERAGE AVANT LA PREPARATION CUTANEE (ANTISEPSIE)                                        |                                                                                 |                                                      |                 |                      |                      |        |
| L'AUDITE FAIT UN REPERAGE AVANT L'APPLICATION DE L'ANTISEPTIQUE ?                            |                                                                                 |                                                      | 1. OUI          | 2. NON               | _                    |        |
| SI NON                                                                                       | ALLER A LA SECTION « PREPARATION CUTANEE »                                      |                                                      |                 |                      |                      |        |
| SI OUI                                                                                       | HYGIÈNE DES MAINS AVANT LE REPERAGE                                             |                                                      | 1. OUI          | 2. NON               | _                    |        |
|                                                                                              | SI OUI 1. PAR FRICTION 2. LAVAGE SIMPLE                                         |                                                      |                 |                      |                      |        |
|                                                                                              | LA TECHNIQUE EST-ELLE CONFORME?                                                 |                                                      | 1. OUI          | 2. NON               | _                    |        |
|                                                                                              | PORT DE GANTS POUR LE REPERAGE                                                  |                                                      | 1. OUI          | 2. NON               | _                    |        |
|                                                                                              | SI OUI 1. GANTS STERILES 2. GANTS NON STERILES                                  |                                                      |                 |                      |                      |        |
|                                                                                              | LE GEL UTILISE EST : 1. MONODOSE STERILE 2. MONODOSE NON STERILE 3. FLACON      |                                                      |                 |                      |                      |        |
|                                                                                              | SI FLACON,                                                                      | LE VOLUME DU FLACON ?                                |                 | 1. ≤250 mL           | 2. >250 mL           | _      |
|                                                                                              |                                                                                 | LA DATE D'OUVERTURE EST NOTEE SUR LE FLACON ?        |                 | 1. OUI               | 2. NON               | _      |
|                                                                                              |                                                                                 | LE FLACON EST OUVERT DEPUIS :                        |                 | 1. ≤24 H             | 2. > 24 H            | 9. NSP |
|                                                                                              |                                                                                 | LE FLACON TOUCHE PEAU OU SONDE PENDANT LE REPERAGE ? |                 | 1. OUI               | 2. NON               | _      |
|                                                                                              |                                                                                 | LE FLACON EST RECAPUCHONNE APRES UTILISATION ?       |                 | 1. OUI               | 2. NON               | _      |
|                                                                                              | LE GEL EST CHAUFFE AVANT UTILISATION ?                                          |                                                      |                 | 1. OUI               | 2. NON               | _      |
|                                                                                              | L'AUDITE UTILISE UNE GAINÉ / HOUSSE : 1. STERILE 2. NON STERILE 3. NON          |                                                      |                 |                      |                      |        |
|                                                                                              | L'AUDITE REALISE UN ESSUYAGE HUMIDE DE LA SONDE A LA FIN DU REPERAGE?           |                                                      |                 | 1. OUI               | 2. NON               | _      |
| SI OUI, LE PRODUIT UTILISÉ EST UN 1. DETERGENT 2. DÉTERGENT/DÉSINFECTANT 3. AUTRE (préciser) |                                                                                 |                                                      |                 |                      |                      |        |
| L'AUDITE POSE LA SONDE SUR SUPPORT PREVU AU NIVEAU DE L'ECHOGRAPHE A LA FIN DU REPERAGE      |                                                                                 |                                                      | 1. OUI          | 2. NON               | _                    |        |
| LA PREPARATION CUTANEE (ANTISEPSIE)                                                          |                                                                                 |                                                      |                 |                      |                      |        |
| L'AUDITE FAIT LA PREPARATION CUTANEE ?                                                       |                                                                                 |                                                      | 1. OUI          | 2. NON               | _                    |        |
| SI NON                                                                                       | ALLER A LA SECTION « INSERTION DU CATHETER »                                    |                                                      |                 |                      |                      |        |
| L'AUDITE A REALISE UNE HYGIÈNE DES MAINS JUSTE AVANT DE DEBUTER L'ANTISEPSIE ?               |                                                                                 |                                                      | 1. OUI          | 2. NON               | _                    |        |
| SI OUI,                                                                                      | 1. PAR DCMF                                                                     | 2. PAR LAVAGE CHIRURG.                               | 3. PAR FRICTION | 4. LAVAGE SIMPLE     | _                    |        |
|                                                                                              | LA TECHNIQUE EST-ELLE CONFORME?                                                 |                                                      | 1. OUI          | 2. NON               | _                    |        |
| L'AUDITE ENFILE DES GANTS AVANT L'ANTISEPSIE ?                                               |                                                                                 |                                                      | 1. OUI          | 2. NON               | _                    |        |
| SI OUI,                                                                                      | 1. STERILES 2. NON STERILES                                                     |                                                      |                 |                      |                      |        |
| DOUBLE GANTAGE ?                                                                             |                                                                                 |                                                      | 1. OUI          | 2. NON               | _                    |        |
| L'AUDITE RETIRE SES GANTS (OU 1 PAIRE SI DOUBLE GANTAGE) APRES L'ANTISEPSIE?                 |                                                                                 |                                                      | 1. OUI          | 2. NON               | _                    |        |

| L'INSERTION DU CATHETER                                                                         |                                                                                                                                                |                                                                     |                      |                 |                        |   |   |
|-------------------------------------------------------------------------------------------------|------------------------------------------------------------------------------------------------------------------------------------------------|---------------------------------------------------------------------|----------------------|-----------------|------------------------|---|---|
| L'AUDITE REALISE UNE HYGIENE DES MAINS JUSTE AVANT L'ENFILAGE DES GANTS ?                       |                                                                                                                                                |                                                                     | 1. OUI               | 2. NON          | 3. NA                  | _ |   |
| SI OUI, 1. PAR DCMF 2. PAR LAVAGE CHIRURG. 3. PAR FRICTION 4. LAVAGE SIMPLE                     |                                                                                                                                                |                                                                     |                      |                 |                        | _ |   |
| LA TECHNIQUE EST-ELLE CONFORME?                                                                 |                                                                                                                                                |                                                                     | 1. OUI               | 2. NON          |                        |   |   |
| L'AUDITE ENFILE DES GANTS :                                                                     |                                                                                                                                                |                                                                     | 1. STERILES          | 2. NON STERILES | 3. NA                  | _ |   |
| L'AUDITE UTILISE UNE GAIN / HOUSSE ?                                                            |                                                                                                                                                |                                                                     | 1. OUI               | 2. NON          |                        |   |   |
| SI OUI                                                                                          | LA GAIN / HOUSSE EST-ELLE STERILE ?                                                                                                            |                                                                     | 1. OUI               | 2. NON          |                        |   |   |
|                                                                                                 | LA GAIN / HOUSSE A-T-ELLE UN MARQUAGE CE ?                                                                                                     |                                                                     | 1. OUI               | 2. NON          |                        |   |   |
|                                                                                                 | LA GAIN / HOUSSE EST-ELLE SPECIFIQUE POUR L'ECHOGUIDAGE ?                                                                                      |                                                                     | 1. OUI               | 2. NON          |                        |   |   |
|                                                                                                 | LA GAIN / HOUSSE RECOUVRE-T-ELLE LA SONDE ET LE CABLE DE L'APPAREIL ?                                                                          |                                                                     | 1. OUI               | 2. NON          |                        |   |   |
| LE SECHAGE SPONTANE DE L'ANTISEPTIQUE AVANT D'APPLIQUER LE GEL EST RESPECTE?                    |                                                                                                                                                |                                                                     | 1. OUI               | 2. NON          |                        |   |   |
| LE GEL UTILISE EST : 1. MONODOSE STERILE 2. MONODOSE NON STERILE 3. NON STERILE EN FLACON (★Q1) |                                                                                                                                                |                                                                     |                      |                 |                        | _ |   |
| LE GEL EST APPLIQUÉ 1. SUR LA GAIN / HOUSSE 2. SUR LA SONDE 3. SUR LA GAIN ET LA SONDE          |                                                                                                                                                |                                                                     |                      |                 |                        | _ |   |
| LA SONDE ENTRE EN CONTACT AVEC L'AIGUILLE DE PONCTION ?                                         |                                                                                                                                                |                                                                     | 1. OUI               | 2. NON          |                        |   |   |
| L'AUDITE MANIPULE L'ECHOGRAPHE PENDANT L'INSERTION DU CATHETER                                  |                                                                                                                                                |                                                                     | 1. OUI               | 2. NON          |                        |   |   |
| SI OUI                                                                                          | 1. L'ECHOGRAPHE EST TOUCHE DIRECTEMENT AVEC LES GANTS STERILES (★Q2)                                                                           |                                                                     |                      |                 |                        | _ |   |
|                                                                                                 | 2. L'ECHOGRAPHE EST TOUCHE EN UTILISANT DES COMPRESSES STERILES                                                                                |                                                                     |                      |                 |                        |   |   |
|                                                                                                 | 3. L'ECHOGRAPHE EST TOUCHE EN UTILISANT DES COMPRESSES NON STERILES                                                                            |                                                                     |                      |                 |                        |   |   |
|                                                                                                 | 4. L'ECHOGRAPHE EST TOUCHE AVEC UNE AUTRE METHODE (préciser)                                                                                   |                                                                     |                      |                 |                        |   |   |
| SI L'ECHOGRAPHE EST TOUCHE DIRECTEMENT AVEC LES GANTS STERILES                                  | SI UNE PAIRE DE GANTS, LES GANTS SONT CHANGES IMMEDIATEMENT AVANT DE CONTINUER LA POSE ?                                                       |                                                                     | 1. OUI               | 2. NON          |                        |   |   |
|                                                                                                 | SI OUI,                                                                                                                                        | UNE HYGIENE DES MAINS EST FAITE AVANT D'ENFILER DE NOUVEAUX GANTS ? |                      | 1. OUI          | 2. NON                 |   |   |
|                                                                                                 |                                                                                                                                                | SI OUI, PAR 1. DCMF 2. LAVAGE CHIRURG. 3. FRICTION 4. LAVAGE SIMPLE |                      |                 |                        |   | _ |
|                                                                                                 | LA TECHNIQUE EST-ELLE CONFORME?                                                                                                                |                                                                     | 1. OUI               | 2. NON          |                        |   |   |
| SI DOUBLE GANTAGE, 1 PAIRE DE GANTS EST IMMEDIATEMENT RETIREE                                   |                                                                                                                                                | 1. OUI                                                              | 2. NON               |                 |                        |   |   |
| A LA FIN DE LA POSE DU CATHETER                                                                 |                                                                                                                                                |                                                                     |                      |                 |                        |   |   |
| GESTION DE LA SONDE                                                                             |                                                                                                                                                |                                                                     |                      |                 |                        |   |   |
| LA GAIN / HOUSSE EST INSPECTEE A L'ŒIL NU                                                       |                                                                                                                                                |                                                                     | 1. OUI               | 2. NON          |                        |   |   |
| LA SONDE EST INSPECTEE: 1. A L'ŒIL NU 2. PAR ESSUYAGE AVEC COMPRESSE 3. NON 4. NA               |                                                                                                                                                |                                                                     |                      |                 |                        | _ |   |
| SI INSPECTION,                                                                                  | LA GAIN / HOUSSE PRESENTE UNE DECHIRURE ?                                                                                                      |                                                                     | 1. OUI               | 2. NON          |                        |   |   |
|                                                                                                 | LA SONDE PRESENTE DES SALISSURES ?                                                                                                             |                                                                     | 1. OUI               | 2. NON          |                        |   |   |
| LA SONDE EST ELLE ENTRETENUE ?                                                                  |                                                                                                                                                |                                                                     | 1. OUI               | 2. NON          |                        |   |   |
| SI OUI, 1. ESSUYAGE HUMIDE AVEC DETERGENT/DESINFECTANT 2. PAR IMMERSION 3. AUTRE (préciser)     |                                                                                                                                                |                                                                     |                      |                 |                        | _ |   |
| LA SONDE EST-ELLE DEPOSEE SUR SUPPORT PREVU AU NIVEAU DE L'ECHOGRAPHE                           |                                                                                                                                                |                                                                     | 1. OUI               | 2. NON          |                        |   |   |
| GESTION DE L'ECHOGRAPHE                                                                         |                                                                                                                                                |                                                                     |                      |                 |                        |   |   |
| L'ECHOGRAPHE BENEFICIE-T-IL D'UN ESSUYAGE HUMIDE ?                                              |                                                                                                                                                |                                                                     | 1. OUI               | 2. NON          | 3. NSP                 | _ |   |
| SI OUI, IL COMPREND                                                                             | LE CABLE                                                                                                                                       |                                                                     | 1. OUI               | 2. NON          | 3. NSP                 | _ |   |
|                                                                                                 | LE CLAVIER                                                                                                                                     |                                                                     | 1. OUI               | 2. NON          | 3. NSP                 | _ |   |
|                                                                                                 | L'ÉCRAN                                                                                                                                        |                                                                     | 1. OUI               | 2. NON          | 3. NSP                 | _ |   |
| LE PRODUIT UTILISÉ EST UN : 1. DÉTERGENT 2. DÉTERGENT/DÉSINFECTANT 3. AUTRE (préciser)          |                                                                                                                                                |                                                                     |                      |                 |                        | _ |   |
| L'ESSUYAGE EST REALISE PAR 1. OPERATEUR 2. AIDE 3. AUTRE (préciser)                             |                                                                                                                                                |                                                                     |                      |                 |                        | _ |   |
| ENTRETIEN AVEC L'AUDITE                                                                         |                                                                                                                                                |                                                                     |                      |                 |                        |   |   |
| Q1                                                                                              | Pourquoi l'opérateur utilise un gel non stérile pour l'échoguidage lors de l'insertion du cathéter ?                                           |                                                                     |                      |                 |                        | _ |   |
|                                                                                                 | 1. HABITUDE                                                                                                                                    |                                                                     | 2. RECO. MECONNUE    |                 | 3. PRATIQUE DU SERVICE |   |   |
|                                                                                                 | 4. PAS D'AUTRE CONDITIONNEMENT                                                                                                                 |                                                                     | 5. AUTRE => PRÉCISER |                 |                        |   |   |
| Q2                                                                                              | Pendant l'insertion du cathéter, pourquoi l'opérateur a poursuivi l'insertion du cathéter avec gants ayant touché le clavier de l'échographe ? |                                                                     |                      |                 |                        | _ |   |
|                                                                                                 | 1. HABITUDE                                                                                                                                    |                                                                     | 2. PEU DE RISQUE     |                 | 3. AUTRE => PRÉCISER   |   |   |
