# Supplementary material for: Ultrasound guidance practices used for the placement of vascular accesses in intensive care units: an observational multicentre study
Source: Eur J Med Res. 2023 Nov 16;28:528. doi: 10.1186/s40001-023-01518-4 (PMC10652560; doi:10.1186/s40001-023-01518-4)
Supplement: Supplementary file 1 — Additional file 1: Questionnaire for operators, aimed at describing their use of ultrasound guidance for catheter insertion. [file 40001_2023_1518_MOESM1_ESM.pdf]

## Questionnaire « Opérateurs » Échoguidage et pose des Cathéters Centraux et Midlines avec prolongateur intégré

|                                                                                                           |                                                                         |                                                       |                                                       |        |        |        |              |
|-----------------------------------------------------------------------------------------------------------|-------------------------------------------------------------------------|-------------------------------------------------------|-------------------------------------------------------|--------|--------|--------|--------------|
| LE REPÉRAGE AVANT LA PREPARATION CUTANEE (ANTISEPSIE)                                                     |                                                                         |                                                       |                                                       |        |        |        |              |
| REALISEZ –VOUS UN REPERAGE AVANT L'APPLICATION DE L'ANTISEPTIQUE                                          |                                                                         |                                                       |                                                       |        | 1. OUI | 2. NON | I _ I        |
| SI OUI                                                                                                    | 1. SYSTEMATIQUEMENT 2. SOUVENT 3. PARFOIS 4. RAREMENT                   |                                                       |                                                       |        | I _ I  |        |              |
|                                                                                                           | LE GEL UTILISE EST :                                                    |                                                       | 1. MONODOSE STERILE 2. MONODOSE NON STERILE 3. FLACON |        | I _ I  |        |              |
|                                                                                                           | UTILISEZ-VOUS UNE GAINE / HOUSSE ?                                      |                                                       | 1. STERILE 2. NON STERILE 3. NON                      |        | I _ I  |        |              |
| L'INSERTION DU CATHETER SOUS ECHOGUIDAGE                                                                  |                                                                         |                                                       |                                                       |        |        |        |              |
| ATTENDEZ-VOUS LE SÉCHAGE SPONTANÉ DE L'ANTISEPTIQUE AVANT D'APPLIQUER LE GEL ?                            |                                                                         |                                                       |                                                       |        | 1. OUI | 2. NON | I _ I        |
| SI OUI                                                                                                    | 1. SYSTEMATIQUEMENT 2. SOUVENT 3. PARFOIS 4. RAREMENT                   |                                                       |                                                       |        | I _ I  |        |              |
| UTILISEZ-VOUS UNE GAINE / HOUSSE ?                                                                        |                                                                         |                                                       |                                                       |        | 1. OUI | 2. NON | I _ I        |
| SI OUI                                                                                                    | 1. SYSTEMATIQUEMENT 2. SOUVENT 3. PARFOIS 4. RAREMENT                   |                                                       |                                                       |        | I _ I  |        |              |
|                                                                                                           | LA GAINE / HOUSSE EST-ELLE STERILE ?                                    |                                                       |                                                       |        | 1. OUI | 2. NON | I _ I        |
|                                                                                                           | LA GAINE / HOUSSE RECOUVRE-T-ELLE LA SONDE ET LE CABLE DE L'APPAREIL ?  |                                                       |                                                       |        | 1. OUI | 2. NON | I _ I        |
|                                                                                                           | LA GAINE / HOUSSE EST-ELLE SPECIFIQUE POUR L'ECHOGUIDAGE ?              |                                                       |                                                       |        | 1. OUI | 2. NON | I _ I        |
| LE GEL UTILISE EST :                                                                                      |                                                                         | 1. MONODOSE STERILE 2. MONODOSE NON STERILE 3. FLACON |                                                       |        | I _ I  |        |              |
| APPLIQUEZ –VOUS LE GEL 1. SUR LA GAINE 2. SUR LA SONDE 3. SUR LA GAINE ET LA SONDE                        |                                                                         |                                                       |                                                       |        | I _ I  |        |              |
| LA SONDE ENTRE-T-ELLE EN CONTACT AVEC L'AIGUILLE DE PONCTION ?                                            |                                                                         |                                                       |                                                       |        | 1. OUI | 2. NON | I _ I        |
| SI OUI                                                                                                    | 1. SYSTEMATIQUEMENT 2. SOUVENT 3. PARFOIS 4. RAREMENT                   |                                                       |                                                       |        | I _ I  |        |              |
| A LA FIN DE L'INSERTION DU CATHETER SOUS ECHOGUIDAGE                                                      |                                                                         |                                                       |                                                       |        |        |        |              |
| POSEZ-VOUS LA SONDE SUR LE SUPPORT PREVU AU NIVEAU DE L'ECHOGRAPHE ?                                      |                                                                         |                                                       |                                                       |        | 1. OUI | 2. NON | I _ I        |
| INSPECTEZ-VOUS LA GAINE / HOUSSE ?                                                                        |                                                                         |                                                       |                                                       |        | 1. OUI | 2. NON | I _ I        |
| SI OUI                                                                                                    | 1. SYSTEMATIQUEMENT 2. SOUVENT 3. PARFOIS 4. RAREMENT                   |                                                       |                                                       |        | I _ I  |        |              |
| INSPECTEZ-VOUS LA SONDE ?                                                                                 |                                                                         |                                                       |                                                       |        | 1. OUI | 2. NON | I _ I        |
| SI OUI                                                                                                    | 1. SYSTEMATIQUEMENT 2. SOUVENT 3. PARFOIS 4. RAREMENT                   |                                                       |                                                       |        | I _ I  |        |              |
|                                                                                                           | 1. A L'OEIL NU 2. PAR ESSUYAGE AVEC COMPRESSE                           |                                                       |                                                       |        | I _ I  |        |              |
| ENTRETIEN DE LA SONDE ET DE L'ECHOGRAPHE                                                                  |                                                                         |                                                       |                                                       |        |        |        |              |
| UN ESSUYAGE HUMIDE DE LA SONDE D'ECHOGRAPHIE EST-IL REALISE JUSTE AVANT QUE VOUS UTILISIEZ L'ECHOGRAPHE ? |                                                                         |                                                       |                                                       |        | 1. OUI | 2. NON | 3. NSP I _ I |
| SI OUI                                                                                                    | 1. SYSTEMATIQUEMENT 2. SOUVENT 3. PARFOIS 4. RAREMENT                   |                                                       |                                                       |        | I _ I  |        |              |
|                                                                                                           | 1. PAR L'AIDE 2. PAR VOUS                                               |                                                       |                                                       |        | 3. NSP | I _ I  |              |
|                                                                                                           | LE PRODUIT UTILISE EST UN 1. DETERGENT 2. DÉTERGENT/DÉSINFECTANT        |                                                       |                                                       |        | 3. NSP | I _ I  |              |
| UN ESSUYAGE HUMIDE DE LA SONDE D'ECHOGRAPHIE EST-IL REALISE A LA FIN DU REPERAGE ?                        |                                                                         |                                                       |                                                       |        | 1. OUI | 2. NON | 3. NSP I _ I |
| SI OUI                                                                                                    | 1. SYSTEMATIQUEMENT 2. SOUVENT 3. PARFOIS 4. RAREMENT                   |                                                       |                                                       |        | I _ I  |        |              |
|                                                                                                           | 1. PAR L'AIDE 2. PAR VOUS                                               |                                                       |                                                       |        | 3. NSP | I _ I  |              |
|                                                                                                           | LE PRODUIT UTILISE EST UN 1. DETERGENT 2. DÉTERGENT/DÉSINFECTANT        |                                                       |                                                       |        | 3. NSP | I _ I  |              |
| UN ESSUYAGE HUMIDE DE LA SONDE D'ECHOGRAPHIE EST-IL REALISE JUSTE AVANT L'INSERTION ?                     |                                                                         |                                                       |                                                       |        | 1. OUI | 2. NON | 3. NSP I _ I |
| SI OUI                                                                                                    | 1. SYSTEMATIQUEMENT 2. SOUVENT 3. PARFOIS 4. RAREMENT                   |                                                       |                                                       |        | I _ I  |        |              |
|                                                                                                           | 1. PAR L'AIDE 2. PAR VOUS                                               |                                                       |                                                       |        | 3. NSP | I _ I  |              |
|                                                                                                           | LE PRODUIT UTILISE EST UN 1. DETERGENT 2. DÉTERGENT/DÉSINFECTANT        |                                                       |                                                       |        | 3. NSP | I _ I  |              |
| A LA FIN DE L'INSERTION, SI UNE DECHIRURE DE LA GAINE OU DES SALISSESURES DE LA SONDE SONT OBSERVEES :    |                                                                         |                                                       |                                                       |        |        |        |              |
| UN NETTOYAGE ET UNE DESINFECTION DE LA SONDE SONT-ILS REALISES ?                                          |                                                                         |                                                       |                                                       |        | 1. OUI | 2. NON | 3. NSP I _ I |
| SI OUI                                                                                                    | 1. SYSTEMATIQUEMENT 2. SOUVENT 3. PARFOIS 4. RAREMENT                   |                                                       |                                                       |        | I _ I  |        |              |
|                                                                                                           | 1. PAR L'AIDE 2. PAR VOUS                                               |                                                       |                                                       |        | 3. NSP | I _ I  |              |
|                                                                                                           | LE PRODUIT UTILISE EST UN 1. DETERGENT 2. DÉTERGENT/DÉSINFECTANT        |                                                       |                                                       |        | 3. NSP | I _ I  |              |
|                                                                                                           | 1. NETTOYAGE HUMIDE AVEC DETERGENT/DESINFECTANT 2. PAR IMMERSION 3. NSP |                                                       |                                                       |        | I _ I  |        |              |
| A LA FIN DE L'INSERTION, SI LA GAINE / HOUSSE EST INTACTE OU VOUS N'OBSERVEZ AUCUNE SALISSEURE            |                                                                         |                                                       |                                                       |        |        |        |              |
| UN NETTOYAGE ET UNE DESINFECTION DE LA SONDE SONT-ILS REALISES ?                                          |                                                                         |                                                       |                                                       |        | 1. OUI | 2. NON | 3. NSP I _ I |
| SI OUI                                                                                                    | 1. SYSTEMATIQUEMENT 2. SOUVENT 3. PARFOIS 4. RAREMENT                   |                                                       |                                                       |        | I _ I  |        |              |
|                                                                                                           | 1. PAR L'AIDE 2. PAR VOUS                                               |                                                       |                                                       |        | 3. NSP | I _ I  |              |
|                                                                                                           | LE PRODUIT UTILISE EST UN 1. DETERGENT 2. DÉTERGENT/DÉSINFECTANT        |                                                       |                                                       |        | 3. NSP | I _ I  |              |
|                                                                                                           | 1. NETTOYAGE HUMIDE AVEC DETERGENT/DESINFECTANT 2. PAR IMMERSION 3. NSP |                                                       |                                                       |        | I _ I  |        |              |
| APRES LA POSE, UN ESSUYAGE HUMIDE DE L'ECHOGRAPHE EST RÉALISÉ ?                                           |                                                                         |                                                       |                                                       |        | 1. OUI | 2. NON | 3. NSP I _ I |
| SI OUI                                                                                                    | 1. SYSTEMATIQUEMENT 2. SOUVENT 3. PARFOIS 4. RAREMENT                   |                                                       |                                                       |        | I _ I  |        |              |
|                                                                                                           | 1. PAR L'AIDE 2. PAR VOUS                                               |                                                       |                                                       |        | 3. NSP | I _ I  |              |
|                                                                                                           | LE PRODUIT UTILISE EST UN 1. DETERGENT 2. DÉTERGENT/DÉSINFECTANT        |                                                       |                                                       |        | 3. NSP | I _ I  |              |
|                                                                                                           | IL COMPREND                                                             | L'ECRAN                                               | 1. OUI                                                | 2. NON | 3. NSP | I _ I  |              |
|                                                                                                           |                                                                         | LE CLAVIER                                            | 1. OUI                                                | 2. NON | 3. NSP | I _ I  |              |
| LE CABLE                                                                                                  |                                                                         | 1. OUI                                                | 2. NON                                                | 3. NSP | I _ I  |        |              |
| APRES LA POSE, L'ECHOGRAPHE EST STOCKÉ A L'ABRI DES CONTAMINATIONS                                        |                                                                         |                                                       |                                                       |        | 1. OUI | 2. NON | 3. NSP I _ I |

**MERCI !**
